# Supplementary material for: Rediscovering the Painting Technique of the 15th Century Panel Painting Depicting the Coronation of the Virgin by Michele di Matteo
Source: MDPI journal article supplement (doi:10.3390/heritage7010016), 2024-01-10
Supplement: s1 [file s1]

## Supplementary information

# Rediscovering the painting technique of the 15th-century panel painting depicting the *Coronation of the Virgin* by Michele di Matteo

Chiara Delledonne <sup>1,2</sup>, Michela Albano <sup>2,3</sup>, Tommaso Rovetta <sup>2</sup>, Gianmarco Borghi <sup>4</sup>, Mario Gentile <sup>4</sup>, Anna Denia Marvelli <sup>4</sup>, Piero Mezzabotta <sup>4</sup>, Lucia Riga <sup>4</sup>, Elisa Salvini <sup>4</sup>, Marta Trucco <sup>4</sup>, Francesca Volpi <sup>2,3,\*</sup> and Giacomo Fiocco <sup>2,3</sup>

<sup>1</sup> Department of Physics, University of Pavia, Via Agostino Bassi 6, 27100, Pavia, Italy; chiara.delledonne@unipv.it (C.D.)

<sup>2</sup> Arvedi Laboratory of Non-Invasive Diagnostics, CISRiC, University of Pavia, Via Bell'Aspa 3, 26100 Cremona, Italy; tommaso.rovetta@unipv.it (T.R.)

<sup>3</sup> Department of Musicology and Cultural Heritage, University of Pavia, C.so Garibaldi 178, 26100 Cremona, Italy; michela.albano@unipv.it (M.A.); francesca.volpi@unipv.it (F.V.); giacomo.fiocco@unipv.it (G.F.)

<sup>4</sup> Laboratory of Applied Diagnostics for Cultural Heritage, Cr.Forma Restoration School, C.so Matteotti 17, 26100 Cremona, Italy; borhigianmarco00@outlook.it (G.B.); mario.gentile@studenti.unimi.it (M.G.); annadenia.marvelli@studio.unibo.it (A.M.); piero.mezzabotta@gmail.com (P.M.); lussi76@yahoo.it (L.R.); elisasalvini@fadbrera.edu.it (E.S.); martatrucco@outlook.com (M.T.)

\* Correspondence: francesca.volpi@unipv.it

## Summary

- **Figure S1** Image of the painting in visible light
- **Figure S2** Image of the painting in UV light
- **Figure S3** X-ray radiography of the painting

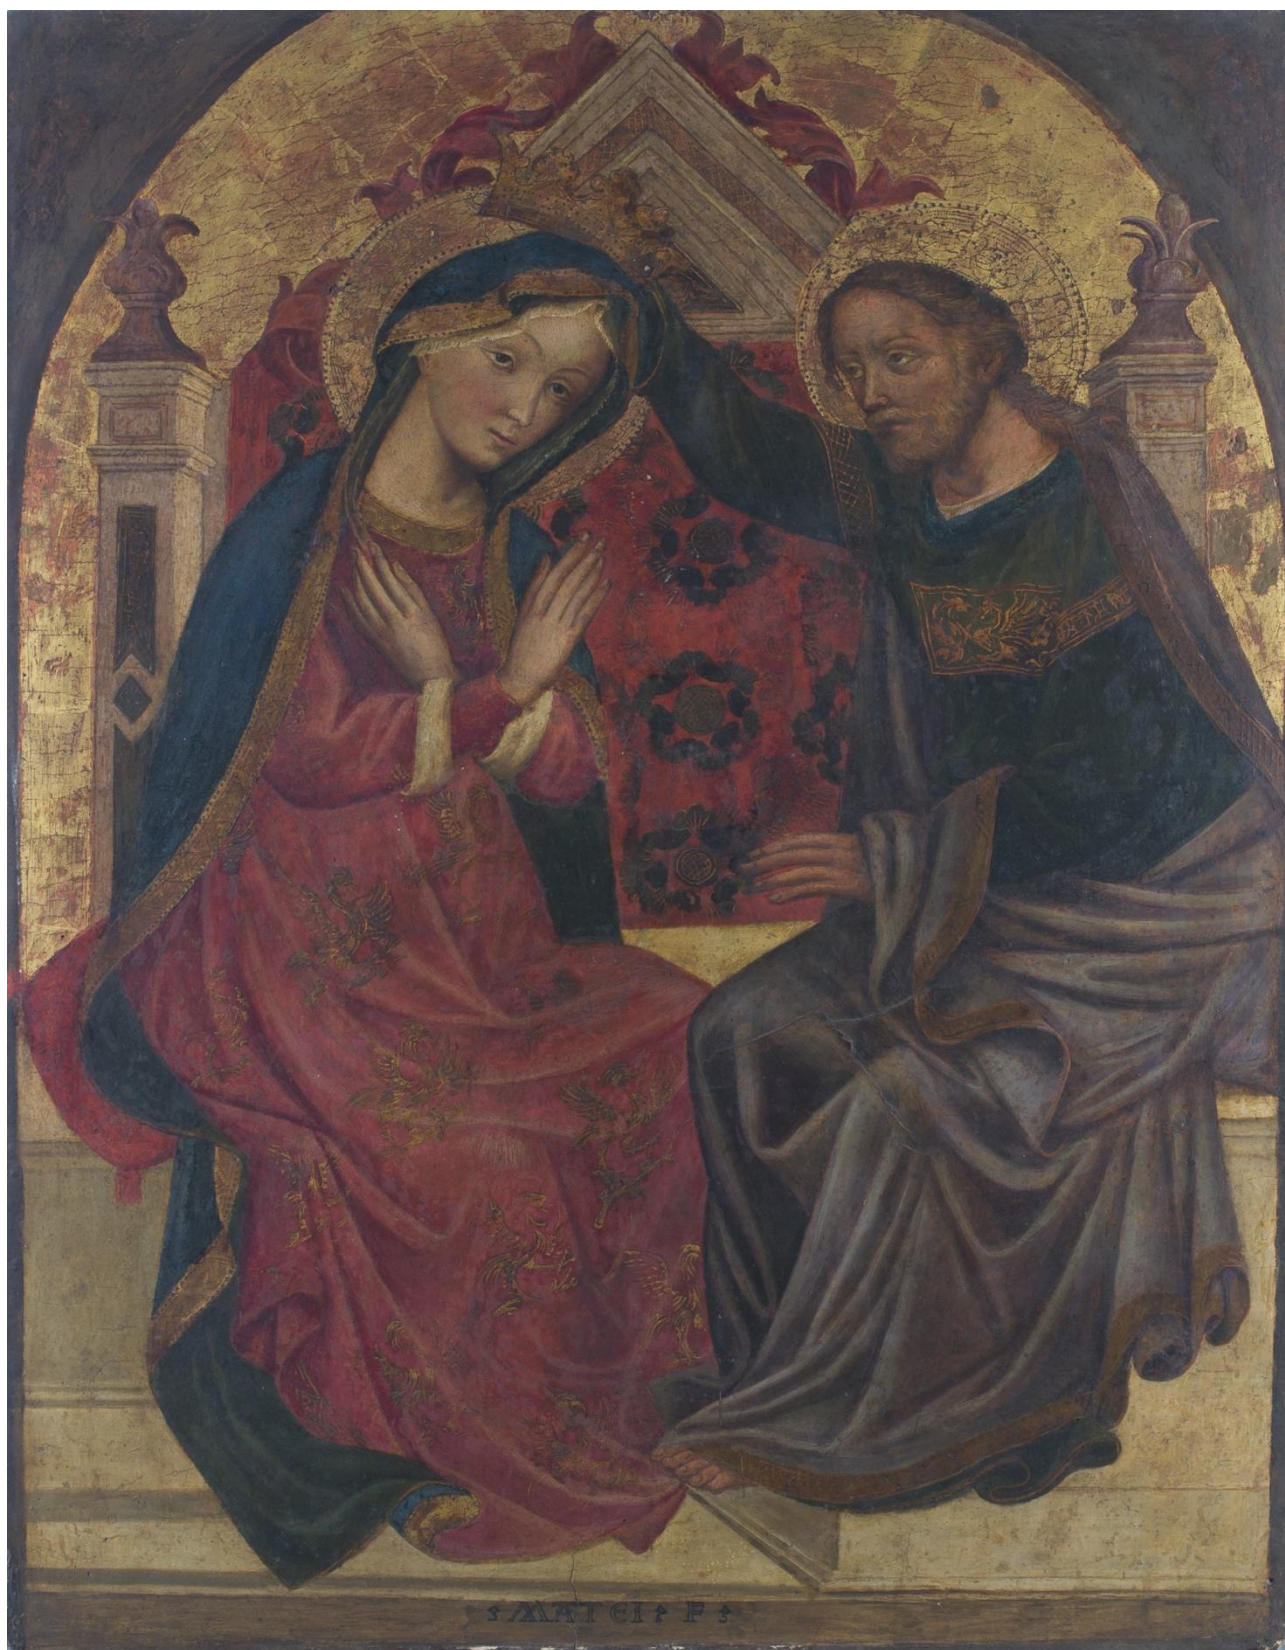

**Figure S1** Photography of the painting *Coronation of the Virgin* by Michele di Matteo in VIS light.



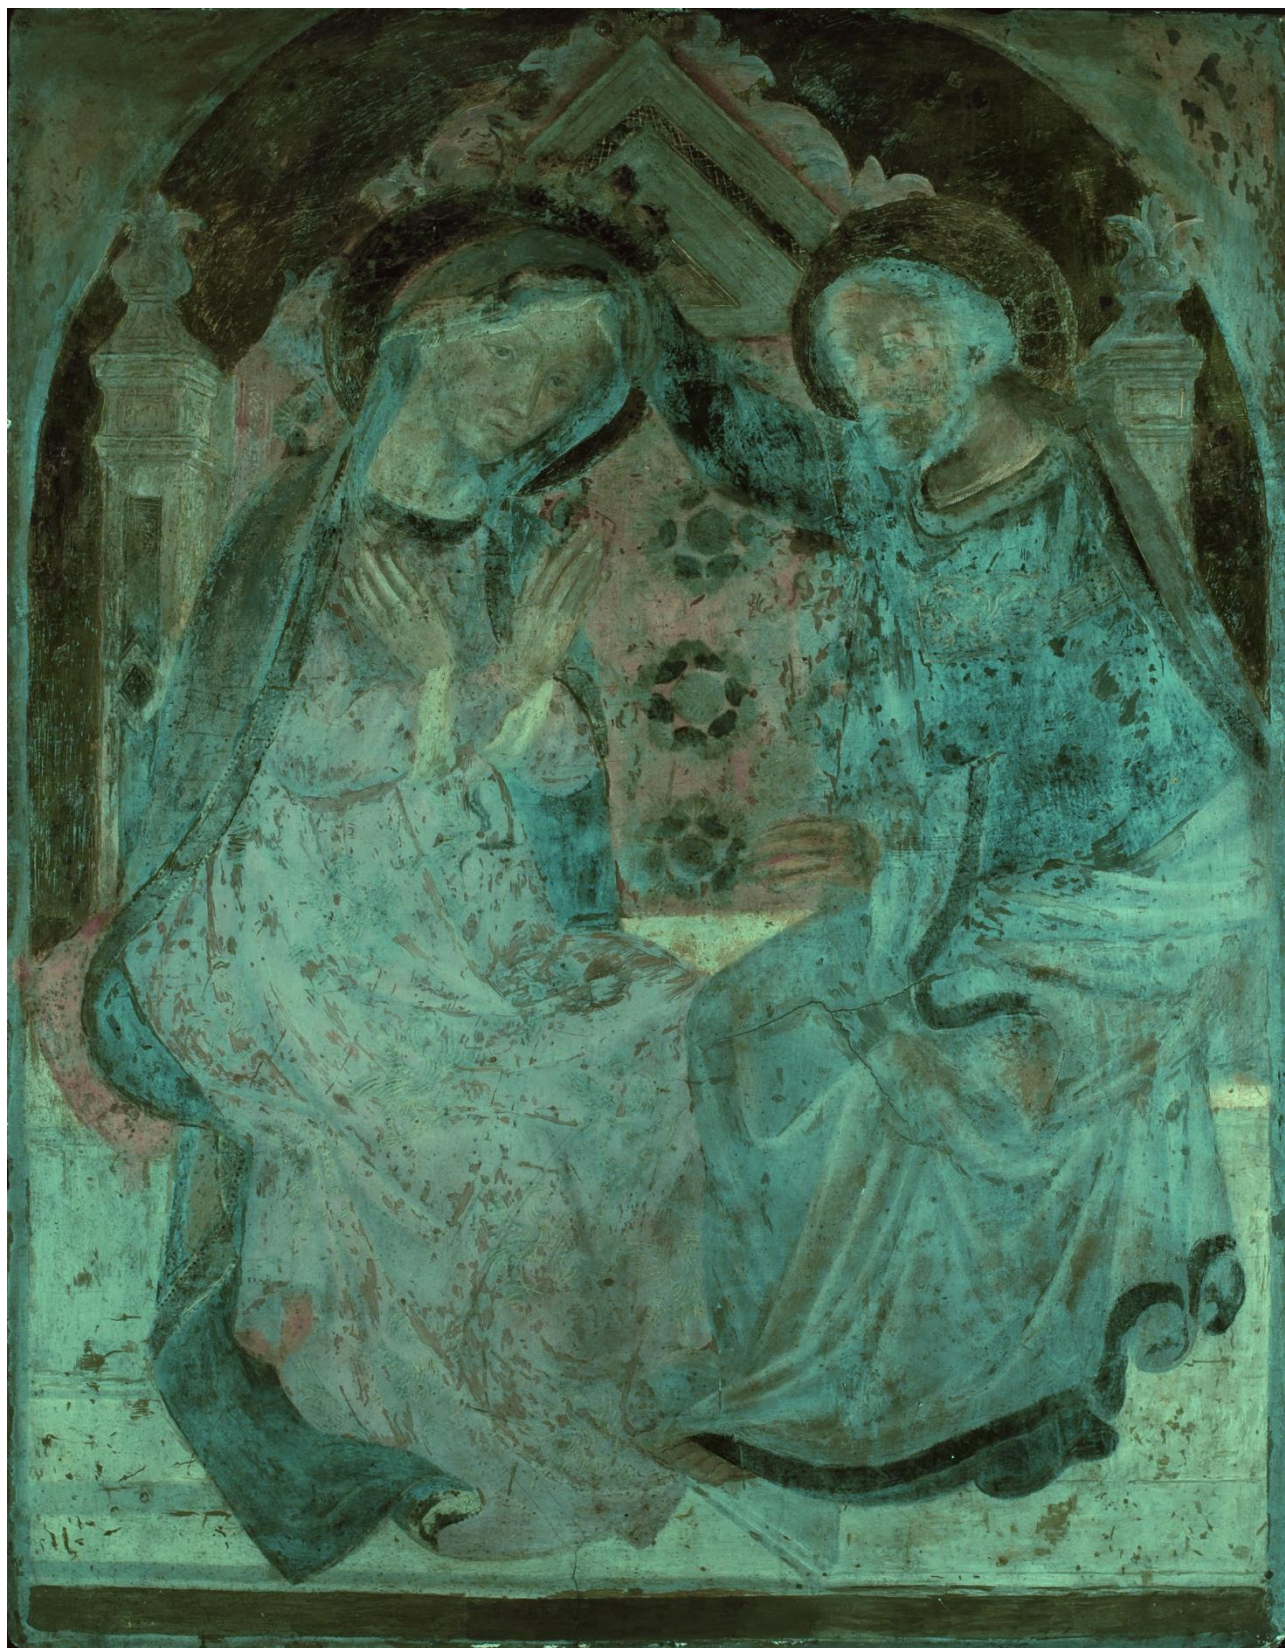

**Figure S2** Photography of the painting in UV light.



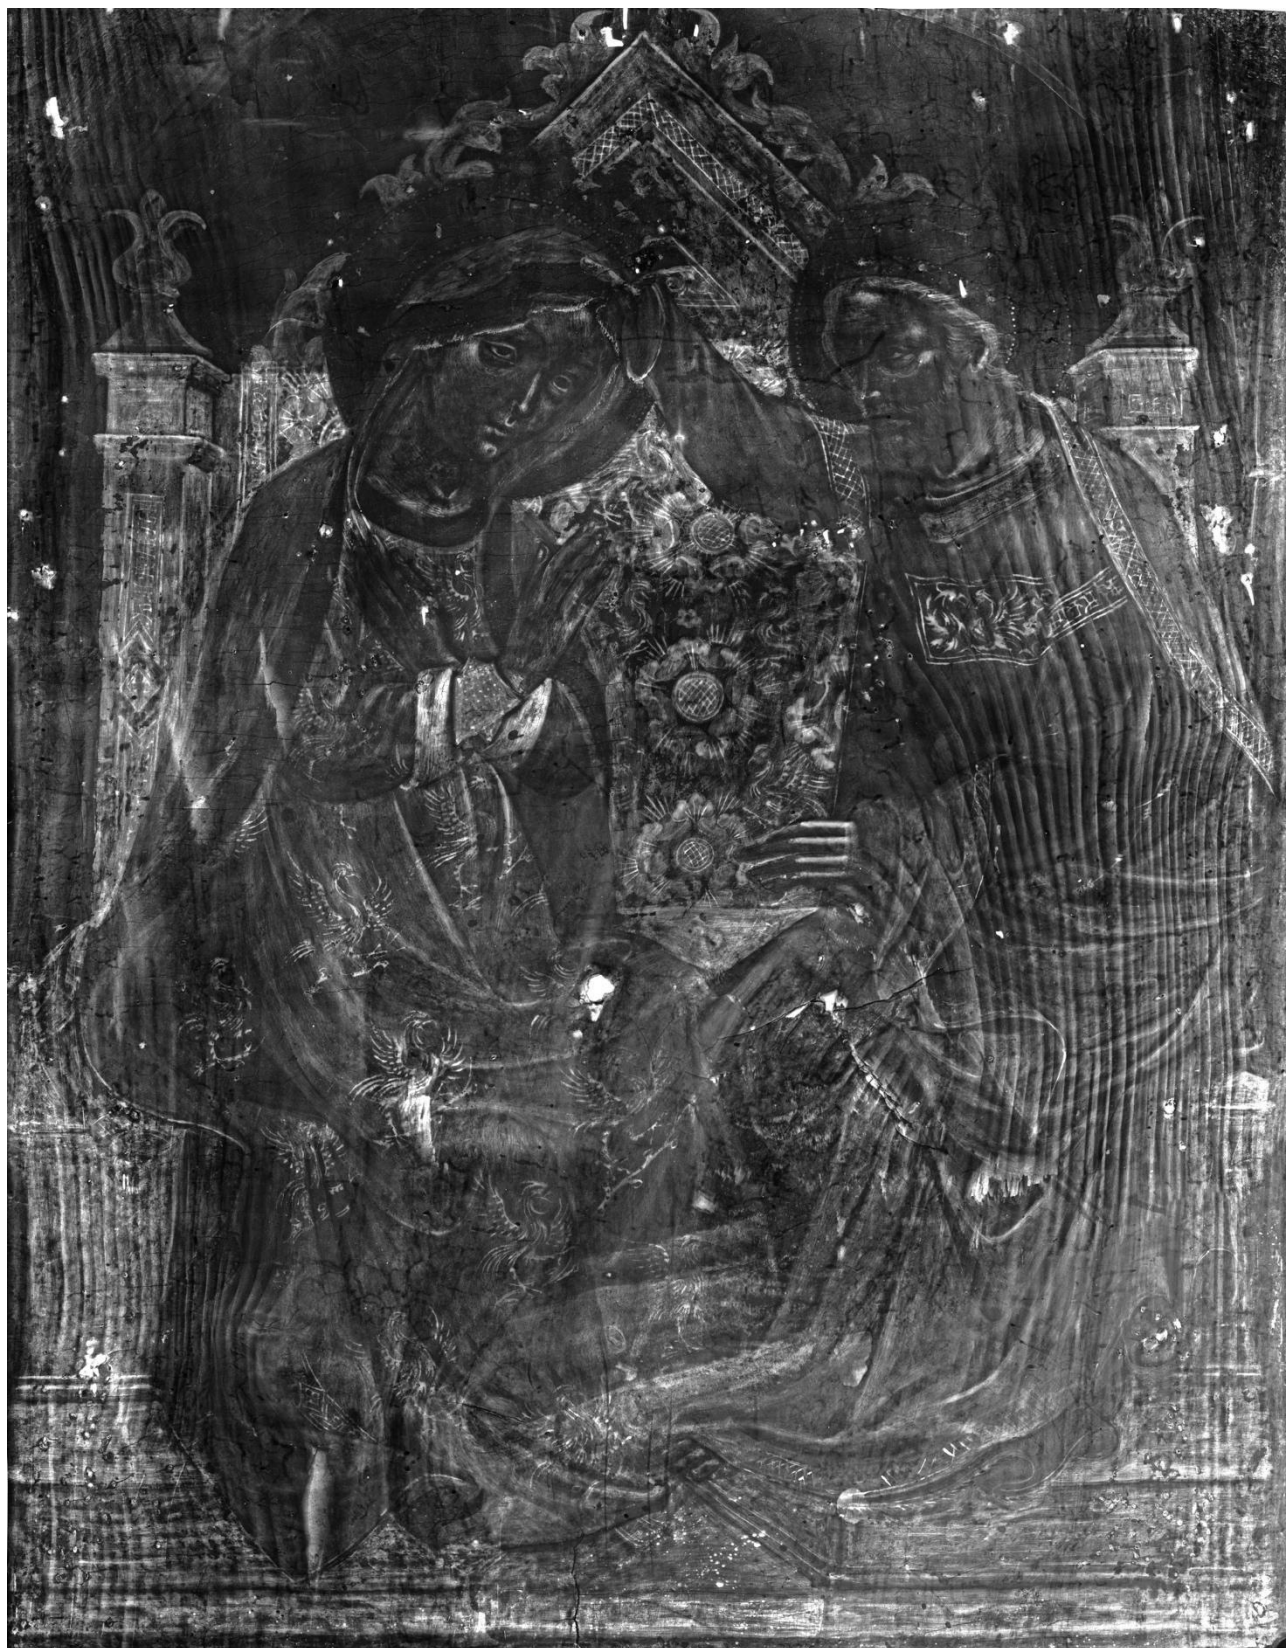

**Figure S3** X-ray radiography of the painting.
