# Supplementary material for: Rediscovering the Painting Technique of the 15th Century Panel Painting Depicting the Coronation of the Virgin by Michele di Matteo
Source: MDPI journal article supplement (doi:10.3390/heritage7010016), 2024-01-10
Supplement: s1 [file s1]

Archive with 1 entries (1 files):
- heritage-2783641-supplementary.pdf
